# Supplementary material
Source: Royal Society of Chemistry journal article supplement (doi:10.1039/d6ma00325g)
Supplement: d6ma00325g1.pdf [file d6ma00325g1.pdf]

## Supplementary Materials

# Thermomechanical and Energetic Coupling in DVB-Based Copolymers: A Unified Physicochemical Study of Adsorption Distance, Surface Energy, and Specific Surface Area

Tayssir Hamieh <sup>a,b,c\*</sup>

<sup>a</sup> Faculty of Science and Engineering, Maastricht University, P.O. Box 616, 6200 MD Maastricht, The Netherlands, Email: [t.hamieh@maastrichtuniversity.nl](mailto:t.hamieh@maastrichtuniversity.nl)

<sup>b</sup> Institut de Science des Matériaux de Mulhouse, Université de Haute-Alsace, CNRS, IS2M UMR 7361, F-68100 Mulhouse, France

<sup>c</sup> Laboratory of Materials, Catalysis, Environment and Analytical Methods Laboratory (MCEMA), Faculty of Sciences, Lebanese University, Hadath, Lebanon

**Table S1.** Values of the specific surface area  $S_{BET}$  ( $\text{m}^2/\text{g}$ ) and microporous volume  $V_m$  ( $\text{cm}^3/\text{g}$ ) of the various copolymers.

| <b>copolymer</b> | <b><math>S_{BET}</math> (<math>\text{m}^2/\text{g}</math>)</b> | <b><math>V_{micro}</math> (<math>\text{cm}^3/\text{g}</math>)</b> | <b><math>V_{meso}</math> (<math>\text{cm}^3/\text{g}</math>)</b> |
|------------------|----------------------------------------------------------------|-------------------------------------------------------------------|------------------------------------------------------------------|
| Poly(CDVB)-DCE   | 1317.8                                                         | 0.49                                                              | 0.93                                                             |
| Poly(CDVB)-NB    | 1268.6                                                         | 0.49                                                              | 0.93                                                             |
| Poly(DVB)-DCE    | 1379.5                                                         | 0.52                                                              | 0.49                                                             |
| Poly(DVB)-NB     | 1236.3                                                         | 0.53                                                              | 0.48                                                             |
| Poly(DVB)        | 775.4                                                          | 0.55                                                              | 0.42                                                             |

**Table S2.** Variations of the free energy  $\Delta G_a^0(T)$  (in kJ/mol) of solvents adsorbed on the different copolymers as a function of temperature.

| Poly(CDVB)-DCE       |        |        |        |        |        |        |        |        |
|----------------------|--------|--------|--------|--------|--------|--------|--------|--------|
| Solvents             | 313.15 | 323.15 | 333.15 | 343.15 | 353.15 | 363.15 | 373.15 | 383.15 |
| n-Pentane            | 28.870 | 28.293 | 27.716 | 27.139 | 26.562 | 25.985 | 25.408 | 24.831 |
| n-Hexane             | 33.454 | 32.800 | 32.146 | 31.492 | 30.838 | 30.184 | 29.530 | 28.876 |
| n-Heptane            | 38.005 | 37.273 | 36.541 | 35.809 | 35.077 | 34.345 | 33.613 | 32.881 |
| n-Octane             | 42.589 | 41.780 | 40.971 | 40.162 | 39.353 | 38.544 | 37.735 | 36.926 |
| n-Nonane             | 47.141 | 46.254 | 45.367 | 44.480 | 43.593 | 42.706 | 41.819 | 40.932 |
| Carbon tetrachloride | 32.952 | 32.316 | 31.674 | 31.032 | 30.397 | 29.755 | 29.119 | 28.477 |
| Nitromethane         | 26.705 | 26.206 | 25.703 | 25.200 | 24.702 | 24.198 | 23.700 | 23.197 |
| Dichloromethane      | 25.742 | 25.258 | 24.770 | 24.283 | 23.799 | 23.311 | 22.828 | 22.340 |
| Trichloromethane     | 31.325 | 30.736 | 30.141 | 29.547 | 28.958 | 28.363 | 27.774 | 27.179 |
| Diethyl ether        | 33.164 | 32.496 | 31.822 | 31.148 | 30.479 | 29.805 | 29.137 | 28.463 |
| THF                  | 29.478 | 28.861 | 28.239 | 27.618 | 27.001 | 26.379 | 25.762 | 25.140 |
| Ethyl Acetate        | 32.549 | 31.884 | 31.213 | 30.541 | 29.876 | 29.205 | 28.539 | 27.868 |
| Acetone              | 25.460 | 24.971 | 24.479 | 23.986 | 23.498 | 23.005 | 22.516 | 22.024 |
| Acetonitrile         | 22.932 | 22.480 | 22.024 | 21.568 | 21.115 | 20.660 | 20.207 | 19.751 |
| Toluene              | 33.231 | 32.586 | 31.935 | 31.284 | 30.639 | 29.988 | 29.343 | 28.692 |
| Benzene              | 28.628 | 28.060 | 27.487 | 26.913 | 26.346 | 25.772 | 25.204 | 24.631 |
| Methanol             | 26.820 | 26.388 | 25.955 | 25.521 | 25.090 | 24.656 | 24.225 | 23.791 |
| Ethanol              | 28.837 | 28.333 | 27.825 | 27.318 | 26.813 | 26.306 | 25.802 | 25.294 |
| Cyclohexane          | 32.484 | 31.860 | 31.230 | 30.599 | 29.975 | 29.344 | 28.721 | 28.090 |
| Poly(CDVB)-NB        |        |        |        |        |        |        |        |        |
| Solvents             | 313.15 | 323.15 | 333.15 | 343.15 | 353.15 | 363.15 | 373.15 | 383.15 |
| n-Pentane            | 28.965 | 28.382 | 27.799 | 27.216 | 26.633 | 26.050 | 25.467 | 24.884 |
| n-Hexane             | 33.554 | 32.890 | 32.226 | 31.562 | 30.898 | 30.234 | 29.570 | 28.906 |
| n-Heptane            | 38.173 | 37.429 | 36.685 | 35.941 | 35.197 | 34.453 | 33.709 | 32.965 |

|                      |        |        |        |        |        |        |        |        |
|----------------------|--------|--------|--------|--------|--------|--------|--------|--------|
| n-Octane             | 42.761 | 41.936 | 41.111 | 40.286 | 39.461 | 38.636 | 37.811 | 36.986 |
| n-Nonane             | 47.380 | 46.475 | 45.570 | 44.665 | 43.760 | 42.855 | 41.950 | 41.045 |
| Carbon tetrachloride | 33.081 | 32.415 | 31.764 | 31.120 | 30.469 | 29.825 | 29.174 | 28.523 |
| Nitromethane         | 26.956 | 26.425 | 25.889 | 25.358 | 24.823 | 24.292 | 23.756 | 23.221 |
| Dichloromethane      | 25.944 | 25.433 | 24.917 | 24.406 | 23.891 | 23.380 | 22.864 | 22.349 |
| Trichloromethane     | 32.038 | 31.383 | 30.722 | 30.067 | 29.406 | 28.750 | 28.089 | 27.428 |
| Diethyl ether        | 33.757 | 33.048 | 32.334 | 31.625 | 30.911 | 30.203 | 29.489 | 28.775 |
| THF                  | 30.037 | 29.386 | 28.731 | 28.081 | 27.425 | 26.775 | 26.120 | 25.464 |
| Ethyl Acetate        | 33.289 | 32.573 | 31.852 | 31.136 | 30.415 | 29.700 | 28.979 | 28.258 |
| Acetone              | 25.440 | 24.946 | 24.448 | 23.954 | 23.456 | 22.962 | 22.464 | 21.966 |
| Acetonitrile         | 23.428 | 22.929 | 22.428 | 21.930 | 21.428 | 20.930 | 20.429 | 19.928 |
| Toluene              | 33.470 | 32.806 | 32.135 | 31.471 | 30.800 | 30.136 | 29.465 | 28.794 |
| Benzene              | 28.719 | 28.144 | 27.563 | 26.988 | 26.407 | 25.831 | 25.250 | 24.669 |
| Methanol             | 27.671 | 27.138 | 26.603 | 26.070 | 25.534 | 25.001 | 24.466 | 23.931 |
| Ethanol              | 29.660 | 29.069 | 28.474 | 27.882 | 27.288 | 26.696 | 26.101 | 25.507 |
| Cyclohexane          | 32.628 | 31.989 | 31.344 | 30.705 | 30.060 | 29.421 | 28.776 | 28.130 |
| Poly(DVB)-DCE        |        |        |        |        |        |        |        |        |
| Solvents             | 313.15 | 323.15 | 333.15 | 343.15 | 353.15 | 363.15 | 373.15 | 383.15 |
| n-Pentane            | 30.308 | 29.656 | 29.004 | 28.352 | 27.700 | 27.048 | 26.396 | 25.744 |
| n-Hexane             | 34.535 | 33.845 | 33.155 | 32.465 | 31.775 | 31.085 | 30.395 | 29.705 |
| n-Heptane            | 38.792 | 38.065 | 37.338 | 36.611 | 35.884 | 35.157 | 34.430 | 33.703 |
| n-Octane             | 43.019 | 42.254 | 41.489 | 40.724 | 39.959 | 39.194 | 38.429 | 37.664 |
| n-Nonane             | 47.277 | 46.475 | 45.673 | 44.871 | 44.069 | 43.267 | 42.465 | 41.663 |
| Carbon tetrachloride | 34.146 | 33.461 | 32.784 | 32.099 | 31.422 | 30.744 | 30.060 | 29.382 |
| Nitromethane         | 28.557 | 27.946 | 27.341 | 26.731 | 26.125 | 25.520 | 24.910 | 24.304 |
| Dichloromethane      | 27.587 | 26.987 | 26.392 | 25.793 | 25.198 | 24.602 | 24.003 | 23.408 |
| Trichloromethane     | 32.779 | 32.121 | 31.469 | 30.811 | 30.159 | 29.507 | 28.850 | 28.198 |
| Diethyl ether        | 35.194 | 34.441 | 33.693 | 32.941 | 32.193 | 31.446 | 30.693 | 29.946 |
| THF                  | 31.775 | 31.042 | 30.314 | 29.581 | 28.853 | 28.125 | 27.392 | 26.664 |
| Ethyl Acetate        | 34.542 | 33.790 | 33.044 | 32.293 | 31.547 | 30.801 | 30.050 | 29.304 |

|                      |        |        |        |        |        |        |        |        |
|----------------------|--------|--------|--------|--------|--------|--------|--------|--------|
| Acetone              | 27.972 | 27.336 | 26.704 | 26.069 | 25.437 | 24.805 | 24.169 | 23.537 |
| Acetonitrile         | 25.589 | 24.971 | 24.355 | 23.737 | 23.121 | 22.506 | 21.887 | 21.272 |
| Toluene              | 34.522 | 33.824 | 33.132 | 32.433 | 31.741 | 31.050 | 30.351 | 29.659 |
| Benzene              | 30.055 | 29.402 | 28.756 | 28.103 | 27.457 | 26.810 | 26.158 | 25.511 |
| Methanol             | 29.595 | 29.015 | 28.436 | 27.856 | 27.278 | 26.699 | 26.119 | 25.541 |
| Ethanol              | 31.477 | 30.840 | 30.206 | 29.569 | 28.936 | 28.302 | 27.665 | 27.031 |
| Cyclohexane          | 33.685 | 33.007 | 32.337 | 31.660 | 30.989 | 30.319 | 29.642 | 28.971 |
| Poly(DVB)-NB         |        |        |        |        |        |        |        |        |
| Solvents             | 313.15 | 323.15 | 333.15 | 343.15 | 353.15 | 363.15 | 373.15 | 383.15 |
| n-Pentane            | 30.836 | 30.206 | 29.576 | 28.946 | 28.316 | 27.686 | 27.056 | 26.426 |
| n-Hexane             | 35.343 | 34.660 | 33.977 | 33.294 | 32.611 | 31.928 | 31.245 | 30.562 |
| n-Heptane            | 39.880 | 39.145 | 38.410 | 37.675 | 36.940 | 36.205 | 35.470 | 34.735 |
| n-Octane             | 44.388 | 43.600 | 42.812 | 42.024 | 41.236 | 40.448 | 39.660 | 38.872 |
| n-Nonane             | 48.925 | 48.085 | 47.245 | 46.405 | 45.565 | 44.725 | 43.885 | 43.045 |
| Carbon tetrachloride | 34.879 | 34.217 | 33.548 | 32.872 | 32.202 | 31.526 | 30.856 | 30.180 |
| Nitromethane         | 28.723 | 28.145 | 27.572 | 26.994 | 26.420 | 25.842 | 25.268 | 24.690 |
| Dichloromethane      | 27.732 | 27.167 | 26.606 | 26.040 | 25.479 | 24.914 | 24.353 | 23.788 |
| Trichloromethane     | 33.170 | 32.537 | 31.910 | 31.277 | 30.649 | 30.016 | 29.389 | 28.756 |
| Diethyl ether        | 35.659 | 34.927 | 34.201 | 33.469 | 32.743 | 32.011 | 31.284 | 30.552 |
| THF                  | 32.043 | 31.343 | 30.649 | 29.949 | 29.255 | 28.555 | 27.860 | 27.161 |
| Ethyl Acetate        | 34.971 | 34.245 | 33.525 | 32.799 | 32.079 | 31.353 | 30.633 | 29.907 |
| Acetone              | 27.999 | 27.398 | 26.799 | 26.198 | 25.599 | 24.997 | 24.399 | 23.797 |
| Acetonitrile         | 25.348 | 24.781 | 24.216 | 23.649 | 23.085 | 22.518 | 21.954 | 21.386 |
| Toluene              | 35.233 | 34.546 | 33.865 | 33.178 | 32.497 | 31.810 | 31.129 | 30.442 |
| Benzene              | 30.569 | 29.940 | 29.318 | 28.689 | 28.066 | 27.438 | 26.815 | 26.186 |
| Methanol             | 29.170 | 28.631 | 28.094 | 27.555 | 27.017 | 26.478 | 25.941 | 25.402 |
| Ethanol              | 31.284 | 30.683 | 30.084 | 29.483 | 28.885 | 28.284 | 27.686 | 27.085 |
| Cyclohexane          | 34.388 | 33.722 | 33.063 | 32.397 | 31.738 | 31.072 | 30.413 | 29.747 |
| Poly(DVB)            |        |        |        |        |        |        |        |        |
| Solvents             | 313.15 | 323.15 | 333.15 | 343.15 | 353.15 | 363.15 | 373.15 | 383.15 |

|                      |        |        |        |        |        |        |        |        |
|----------------------|--------|--------|--------|--------|--------|--------|--------|--------|
| n-Pentane            | 33.346 | 32.227 | 31.108 | 29.989 | 28.870 | 27.751 | 26.632 | 25.513 |
| n-Hexane             | 46.154 | 44.431 | 42.708 | 40.985 | 39.262 | 37.539 | 35.816 | 34.093 |
| n-Heptane            | 57.663 | 55.399 | 53.135 | 50.871 | 48.607 | 46.343 | 44.079 | 41.815 |
| n-Octane             | 73.428 | 70.423 | 67.418 | 64.413 | 61.408 | 58.403 | 55.398 | 52.393 |
| n-Nonane             | 83.316 | 79.845 | 76.374 | 72.903 | 69.432 | 65.961 | 62.490 | 59.019 |
| Carbon tetrachloride | 44.795 | 43.175 | 41.562 | 39.942 | 38.322 | 36.702 | 35.083 | 33.463 |
| Nitromethane         | 29.457 | 28.768 | 28.084 | 27.395 | 26.707 | 26.018 | 25.330 | 24.640 |
| Dichloromethane      | 29.953 | 29.563 | 29.179 | 28.789 | 28.400 | 28.010 | 27.621 | 27.231 |
| Trichloromethane     | 40.800 | 39.650 | 38.507 | 37.356 | 36.207 | 35.057 | 33.908 | 32.757 |
| Diethyl ether        | 53.621 | 51.590 | 49.565 | 47.534 | 45.504 | 43.472 | 41.442 | 39.411 |
| THF                  | 43.423 | 41.818 | 40.220 | 38.615 | 37.012 | 35.408 | 33.804 | 32.200 |
| Ethyl Acetate        | 50.806 | 48.988 | 47.177 | 45.360 | 43.544 | 41.726 | 39.910 | 38.092 |
| Acetone              | 38.213 | 36.876 | 35.541 | 34.204 | 32.867 | 31.530 | 30.193 | 28.856 |
| Acetonitrile         | 38.869 | 37.512 | 36.157 | 34.801 | 33.444 | 32.087 | 30.731 | 29.374 |
| Toluene              | 47.597 | 45.752 | 43.914 | 42.069 | 40.225 | 38.380 | 36.535 | 34.690 |
| Benzene              | 32.640 | 31.565 | 30.498 | 29.423 | 28.350 | 27.276 | 26.202 | 25.128 |
| Methanol             | 61.102 | 59.229 | 57.358 | 55.486 | 53.613 | 51.741 | 49.869 | 47.996 |
| Ethanol              | 46.084 | 44.165 | 42.248 | 40.329 | 38.410 | 36.492 | 34.573 | 32.654 |
| Cyclohexane          | 43.115 | 41.582 | 40.057 | 38.524 | 36.992 | 35.460 | 33.928 | 32.395 |

**Table S3.** Variations of the London dispersive free energy  $\Delta G_a^d(T)$  (in kJ/mol) of solvents adsorbed on the different copolymers as a function of temperature.

| Poly(CDVB)-DCE |        |        |        |        |        |        |        |        |
|----------------|--------|--------|--------|--------|--------|--------|--------|--------|
| Solvents       | 313.15 | 323.15 | 333.15 | 343.15 | 353.15 | 363.15 | 373.15 | 383.15 |
| n-Pentane      | 28.870 | 28.293 | 27.716 | 27.139 | 26.562 | 25.985 | 25.408 | 24.831 |
| n-Hexane       | 33.454 | 32.800 | 32.146 | 31.492 | 30.838 | 30.184 | 29.530 | 28.876 |
| n-Heptane      | 38.005 | 37.273 | 36.541 | 35.809 | 35.077 | 34.345 | 33.613 | 32.881 |
| n-Octane       | 42.589 | 41.780 | 40.971 | 40.162 | 39.353 | 38.544 | 37.735 | 36.926 |
| n-Nonane       | 47.141 | 46.254 | 45.367 | 44.480 | 43.593 | 42.706 | 41.819 | 40.932 |

|                      |        |        |        |        |        |        |        |        |
|----------------------|--------|--------|--------|--------|--------|--------|--------|--------|
| Carbon tetrachloride | 32.447 | 31.813 | 31.173 | 30.532 | 29.899 | 29.258 | 28.625 | 27.984 |
| Nitromethane         | 22.692 | 22.223 | 21.749 | 21.275 | 20.806 | 20.332 | 19.862 | 19.388 |
| Dichloromethane      | 22.444 | 21.978 | 21.509 | 21.039 | 20.574 | 20.104 | 19.639 | 19.169 |
| Trichloromethane     | 26.962 | 26.420 | 25.874 | 25.327 | 24.786 | 24.239 | 23.698 | 23.151 |
| Diethyl ether        | 26.617 | 26.081 | 25.540 | 24.999 | 24.464 | 23.923 | 23.387 | 22.846 |
| THF                  | 23.360 | 22.879 | 22.394 | 21.909 | 21.428 | 20.943 | 20.462 | 19.977 |
| Ethyl Acetate        | 26.396 | 25.864 | 25.327 | 24.790 | 24.258 | 23.721 | 23.189 | 22.652 |
| Acetone              | 19.023 | 18.615 | 18.204 | 17.793 | 17.385 | 16.974 | 16.566 | 16.155 |
| Acetonitrile         | 15.341 | 14.996 | 14.647 | 14.299 | 13.953 | 13.605 | 13.259 | 12.911 |
| Toluene              | 31.398 | 30.782 | 30.159 | 29.537 | 28.921 | 28.298 | 27.683 | 27.060 |
| Benzene              | 28.468 | 27.901 | 27.328 | 26.756 | 26.189 | 25.617 | 25.050 | 24.478 |
| Methanol             | 11.661 | 11.377 | 11.091 | 10.806 | 10.522 | 10.236 | 9.953  | 9.667  |
| Ethanol              | 15.499 | 15.150 | 14.799 | 14.448 | 14.100 | 13.748 | 13.400 | 13.049 |
| Cyclohexane          | 31.697 | 31.076 | 30.449 | 29.821 | 29.200 | 28.572 | 27.951 | 27.324 |
| Poly(CDVB)-NB        |        |        |        |        |        |        |        |        |
| Solvents             | 313.15 | 323.15 | 333.15 | 343.15 | 353.15 | 363.15 | 373.15 | 383.15 |
| n-Pentane            | 28.965 | 28.382 | 27.799 | 27.216 | 26.633 | 26.050 | 25.467 | 24.884 |
| n-Hexane             | 33.554 | 32.890 | 32.226 | 31.562 | 30.898 | 30.234 | 29.570 | 28.906 |
| n-Heptane            | 38.173 | 37.429 | 36.685 | 35.941 | 35.197 | 34.453 | 33.709 | 32.965 |
| n-Octane             | 42.761 | 41.936 | 41.111 | 40.286 | 39.461 | 38.636 | 37.811 | 36.986 |
| n-Nonane             | 47.380 | 46.475 | 45.570 | 44.665 | 43.760 | 42.855 | 41.950 | 41.045 |
| Carbon tetrachloride | 32.555 | 31.912 | 31.263 | 30.620 | 29.971 | 29.329 | 28.679 | 28.030 |
| Nitromethane         | 22.727 | 22.256 | 21.779 | 21.307 | 20.831 | 20.359 | 19.883 | 19.406 |
| Dichloromethane      | 22.476 | 22.009 | 21.537 | 21.070 | 20.598 | 20.130 | 19.658 | 19.186 |
| Trichloromethane     | 27.029 | 26.482 | 25.930 | 25.383 | 24.831 | 24.285 | 23.733 | 23.181 |
| Diethyl ether        | 26.684 | 26.144 | 25.598 | 25.057 | 24.511 | 23.971 | 23.425 | 22.879 |
| THF                  | 23.403 | 22.919 | 22.431 | 21.948 | 21.459 | 20.976 | 20.488 | 19.999 |
| Ethyl Acetate        | 26.461 | 25.924 | 25.382 | 24.845 | 24.303 | 23.767 | 23.225 | 22.682 |
| Acetone              | 19.032 | 18.624 | 18.213 | 17.806 | 17.394 | 16.987 | 16.575 | 16.164 |
| Acetonitrile         | 15.320 | 14.976 | 14.630 | 14.287 | 13.941 | 13.598 | 13.252 | 12.906 |

|                      |        |        |        |        |        |        |        |        |
|----------------------|--------|--------|--------|--------|--------|--------|--------|--------|
| Toluene              | 31.505 | 30.880 | 30.249 | 29.625 | 28.994 | 28.370 | 27.739 | 27.108 |
| Benzene              | 28.550 | 27.977 | 27.399 | 26.826 | 26.247 | 25.674 | 25.095 | 24.516 |
| Methanol             | 11.612 | 11.333 | 11.053 | 10.774 | 10.493 | 10.214 | 9.934  | 9.653  |
| Ethanol              | 15.480 | 15.134 | 14.785 | 14.439 | 14.090 | 13.744 | 13.395 | 13.047 |
| Cyclohexane          | 31.803 | 31.174 | 30.538 | 29.908 | 29.272 | 28.643 | 28.007 | 27.370 |
| Poly(DVB)-DCE        |        |        |        |        |        |        |        |        |
| Solvents             | 313.15 | 323.15 | 333.15 | 343.15 | 353.15 | 363.15 | 373.15 | 383.15 |
| n-Pentane            | 30.308 | 29.656 | 29.004 | 28.352 | 27.700 | 27.048 | 26.396 | 25.744 |
| n-Hexane             | 34.535 | 33.845 | 33.155 | 32.465 | 31.775 | 31.085 | 30.395 | 29.705 |
| n-Heptane            | 38.792 | 38.065 | 37.338 | 36.611 | 35.884 | 35.157 | 34.430 | 33.703 |
| n-Octane             | 43.019 | 42.254 | 41.489 | 40.724 | 39.959 | 39.194 | 38.429 | 37.664 |
| n-Nonane             | 47.277 | 46.475 | 45.673 | 44.871 | 44.069 | 43.267 | 42.465 | 41.663 |
| Carbon tetrachloride | 33.657 | 32.970 | 32.291 | 31.605 | 30.926 | 30.247 | 29.560 | 28.881 |
| Nitromethane         | 24.566 | 23.962 | 23.362 | 22.758 | 22.158 | 21.558 | 20.954 | 20.354 |
| Dichloromethane      | 24.339 | 23.736 | 23.139 | 22.536 | 21.939 | 21.341 | 20.739 | 20.141 |
| Trichloromethane     | 28.547 | 27.907 | 27.272 | 26.632 | 25.997 | 25.363 | 24.723 | 24.088 |
| Diethyl ether        | 28.184 | 27.547 | 26.916 | 26.279 | 25.647 | 25.016 | 24.379 | 23.748 |
| THF                  | 25.155 | 24.545 | 23.940 | 23.330 | 22.725 | 22.121 | 21.511 | 20.906 |
| Ethyl Acetate        | 27.990 | 27.355 | 26.726 | 26.090 | 25.461 | 24.831 | 24.196 | 23.566 |
| Acetone              | 21.130 | 20.556 | 19.986 | 19.413 | 18.843 | 18.274 | 17.700 | 17.131 |
| Acetonitrile         | 17.735 | 17.192 | 16.652 | 16.109 | 15.569 | 15.029 | 14.486 | 13.946 |
| Toluene              | 32.607 | 31.930 | 31.260 | 30.583 | 29.913 | 29.243 | 28.567 | 27.897 |
| Benzene              | 29.897 | 29.245 | 28.599 | 27.946 | 27.300 | 26.654 | 26.001 | 25.355 |
| Methanol             | 14.295 | 13.783 | 13.273 | 12.761 | 12.251 | 11.741 | 11.229 | 10.720 |
| Ethanol              | 17.863 | 17.319 | 16.777 | 16.233 | 15.692 | 15.151 | 14.607 | 14.066 |
| Cyclohexane          | 32.917 | 32.237 | 31.564 | 30.885 | 30.212 | 29.539 | 28.860 | 28.187 |
| Poly(DVB)-NB         |        |        |        |        |        |        |        |        |
| Solvents             | 313.15 | 323.15 | 333.15 | 343.15 | 353.15 | 363.15 | 373.15 | 383.15 |
| n-Pentane            | 30.836 | 30.206 | 29.576 | 28.946 | 28.316 | 27.686 | 27.056 | 26.426 |
| n-Hexane             | 35.343 | 34.660 | 33.977 | 33.294 | 32.611 | 31.928 | 31.245 | 30.562 |

|                      |        |        |        |        |        |        |        |        |
|----------------------|--------|--------|--------|--------|--------|--------|--------|--------|
| n-Heptane            | 39.880 | 39.145 | 38.410 | 37.675 | 36.940 | 36.205 | 35.470 | 34.735 |
| n-Octane             | 44.388 | 43.600 | 42.812 | 42.024 | 41.236 | 40.448 | 39.660 | 38.872 |
| n-Nonane             | 48.925 | 48.085 | 47.245 | 46.405 | 45.565 | 44.725 | 43.885 | 43.045 |
| Carbon tetrachloride | 34.389 | 33.714 | 33.047 | 32.372 | 31.704 | 31.029 | 30.361 | 29.687 |
| Nitromethane         | 24.712 | 24.151 | 23.594 | 23.033 | 22.476 | 21.915 | 21.358 | 20.797 |
| Dichloromethane      | 24.468 | 23.910 | 23.356 | 22.798 | 22.244 | 21.685 | 21.131 | 20.573 |
| Trichloromethane     | 28.949 | 28.338 | 27.732 | 27.122 | 26.516 | 25.905 | 25.300 | 24.689 |
| Diethyl ether        | 28.580 | 27.973 | 27.372 | 26.766 | 26.165 | 25.558 | 24.957 | 24.350 |
| THF                  | 25.353 | 24.784 | 24.220 | 23.651 | 23.087 | 22.518 | 21.954 | 21.386 |
| Ethyl Acetate        | 28.369 | 27.765 | 27.166 | 26.562 | 25.963 | 25.359 | 24.760 | 24.156 |
| Acetone              | 21.061 | 20.543 | 20.028 | 19.509 | 18.995 | 18.476 | 17.961 | 17.443 |
| Acetonitrile         | 17.432 | 16.956 | 16.483 | 16.007 | 15.534 | 15.058 | 14.585 | 14.109 |
| Toluene              | 33.302 | 32.640 | 31.985 | 31.323 | 30.668 | 30.006 | 29.350 | 28.689 |
| Benzene              | 30.409 | 29.781 | 29.159 | 28.531 | 27.909 | 27.280 | 26.658 | 26.030 |
| Methanol             | 13.774 | 13.341 | 12.910 | 12.477 | 12.046 | 11.613 | 11.182 | 10.749 |
| Ethanol              | 17.576 | 17.098 | 16.623 | 16.146 | 15.671 | 15.193 | 14.719 | 14.241 |
| Cyclohexane          | 33.619 | 32.953 | 32.294 | 31.629 | 30.970 | 30.304 | 29.645 | 28.979 |
| Poly(DVB)            |        |        |        |        |        |        |        |        |
| Solvents             | 313.15 | 323.15 | 333.15 | 343.15 | 353.15 | 363.15 | 373.15 | 383.15 |
| n-Pentane            | 33.346 | 32.227 | 31.108 | 29.989 | 28.870 | 27.751 | 26.632 | 25.513 |
| n-Hexane             | 46.154 | 44.431 | 42.708 | 40.985 | 39.262 | 37.539 | 35.816 | 34.093 |
| n-Heptane            | 57.663 | 55.399 | 53.135 | 50.871 | 48.607 | 46.343 | 44.079 | 41.815 |
| n-Octane             | 73.428 | 70.423 | 67.418 | 64.413 | 61.408 | 58.403 | 55.398 | 52.393 |
| n-Nonane             | 83.316 | 79.845 | 76.374 | 72.903 | 69.432 | 65.961 | 62.490 | 59.019 |
| Carbon tetrachloride | 43.206 | 41.621 | 40.044 | 38.459 | 36.875 | 35.289 | 33.705 | 32.120 |
| Nitromethane         | 15.962 | 15.659 | 15.362 | 15.059 | 14.758 | 14.455 | 14.153 | 13.850 |
| Dichloromethane      | 15.265 | 14.995 | 14.731 | 14.461 | 14.192 | 13.922 | 13.653 | 13.383 |
| Trichloromethane     | 27.886 | 27.022 | 26.164 | 25.300 | 24.437 | 23.573 | 22.710 | 21.846 |
| Diethyl ether        | 26.945 | 26.126 | 25.312 | 24.493 | 23.674 | 22.854 | 22.035 | 21.216 |
| THF                  | 17.847 | 17.455 | 17.069 | 16.678 | 16.287 | 15.896 | 15.505 | 15.114 |

|               |        |        |        |        |        |        |        |        |
|---------------|--------|--------|--------|--------|--------|--------|--------|--------|
| Ethyl Acetate | 26.321 | 25.531 | 24.747 | 23.956 | 23.167 | 22.377 | 21.587 | 20.797 |
| Acetone       | 11.580 | 11.383 | 11.187 | 10.989 | 10.792 | 10.594 | 10.397 | 10.199 |
| Acetonitrile  | 12.238 | 12.021 | 11.805 | 11.588 | 11.371 | 11.154 | 10.937 | 10.719 |
| Toluene       | 40.319 | 38.870 | 37.428 | 35.979 | 34.531 | 33.081 | 31.633 | 30.184 |
| Benzene       | 32.122 | 31.059 | 30.002 | 28.939 | 27.877 | 26.813 | 25.751 | 24.687 |
| Methanol      | 8.064  | 7.906  | 7.749  | 7.591  | 7.433  | 7.275  | 7.117  | 6.959  |
| Ethanol       | 9.619  | 9.510  | 9.403  | 9.294  | 9.185  | 9.077  | 8.968  | 8.860  |
| Cyclohexane   | 41.137 | 39.649 | 38.169 | 36.681 | 35.195 | 33.707 | 32.220 | 30.732 |

**Table S4.** Variations of the polar free energy  $\Delta G_a^p(T)$  (in kJ/mol) of solvents adsorbed on the different copolymers as a function of temperature.

| Poly(CDVB)-DCE |        |        |        |        |        |        |        |        |
|----------------|--------|--------|--------|--------|--------|--------|--------|--------|
| T(K)           | 313.15 | 323.15 | 333.15 | 343.15 | 353.15 | 363.15 | 373.15 | 383.15 |
| CCl4           | 0.505  | 0.503  | 0.501  | 0.500  | 0.498  | 0.496  | 0.495  | 0.493  |
| Nitromethane   | 4.013  | 3.983  | 3.954  | 3.925  | 3.896  | 3.867  | 3.837  | 3.808  |
| DCM            | 3.298  | 3.280  | 3.262  | 3.243  | 3.225  | 3.207  | 3.189  | 3.171  |
| TCM            | 4.363  | 4.315  | 4.268  | 4.220  | 4.172  | 4.124  | 4.076  | 4.029  |
| Diethyl ether  | 6.548  | 6.415  | 6.282  | 6.149  | 6.016  | 5.882  | 5.749  | 5.616  |
| THF            | 6.118  | 5.981  | 5.845  | 5.709  | 5.573  | 5.436  | 5.300  | 5.164  |
| Ethyl Acetate  | 6.154  | 6.020  | 5.886  | 5.752  | 5.618  | 5.484  | 5.350  | 5.216  |
| Acetone        | 6.437  | 6.356  | 6.275  | 6.194  | 6.112  | 6.031  | 5.950  | 5.869  |
| Acetonitrile   | 7.591  | 7.484  | 7.377  | 7.269  | 7.162  | 7.055  | 6.948  | 6.841  |
| Toluene        | 1.833  | 1.804  | 1.776  | 1.747  | 1.718  | 1.689  | 1.660  | 1.632  |
| Benzene        | 0.161  | 0.159  | 0.158  | 0.157  | 0.156  | 0.155  | 0.154  | 0.153  |
| Methanol       | 15.160 | 15.012 | 14.864 | 14.716 | 14.568 | 14.420 | 14.272 | 14.124 |
| Ethanol        | 13.339 | 13.182 | 13.026 | 12.870 | 12.714 | 12.558 | 12.401 | 12.245 |
| Cyclohexane    | 0.787  | 0.784  | 0.781  | 0.778  | 0.775  | 0.772  | 0.769  | 0.766  |
| Poly(CDVB)-NB  |        |        |        |        |        |        |        |        |
| T(K)           | 313.15 | 323.15 | 333.15 | 343.15 | 353.15 | 363.15 | 373.15 | 383.15 |
| CCl4           | 0.526  | 0.503  | 0.501  | 0.500  | 0.498  | 0.496  | 0.495  | 0.493  |
| Nitromethane   | 4.228  | 4.169  | 4.110  | 4.051  | 3.992  | 3.933  | 3.874  | 3.815  |
| DCM            | 3.468  | 3.424  | 3.380  | 3.337  | 3.293  | 3.250  | 3.206  | 3.162  |
| TCM            | 5.010  | 4.901  | 4.792  | 4.683  | 4.574  | 4.465  | 4.356  | 4.247  |
| Diethyl ether  | 7.072  | 6.904  | 6.736  | 6.568  | 6.400  | 6.232  | 6.064  | 5.896  |

|               |        |        |        |        |        |        |        |        |
|---------------|--------|--------|--------|--------|--------|--------|--------|--------|
| THF           | 6.634  | 6.467  | 6.300  | 6.133  | 5.966  | 5.799  | 5.632  | 5.465  |
| Ethyl Acetate | 6.828  | 6.649  | 6.470  | 6.291  | 6.112  | 5.933  | 5.754  | 5.575  |
| Acetone       | 6.408  | 6.322  | 6.235  | 6.148  | 6.062  | 5.975  | 5.889  | 5.802  |
| Acetonitrile  | 8.108  | 7.953  | 7.798  | 7.642  | 7.487  | 7.332  | 7.177  | 7.022  |
| Toluene       | 1.966  | 1.926  | 1.886  | 1.846  | 1.806  | 1.766  | 1.726  | 1.686  |
| Benzene       | 0.169  | 0.167  | 0.164  | 0.162  | 0.160  | 0.157  | 0.155  | 0.153  |
| Methanol      | 16.059 | 15.805 | 15.550 | 15.296 | 15.041 | 14.787 | 14.532 | 14.278 |
| Ethanol       | 14.181 | 13.935 | 13.689 | 13.443 | 13.198 | 12.952 | 12.706 | 12.460 |
| Cyclohexane   | 0.825  | 0.815  | 0.806  | 0.797  | 0.788  | 0.778  | 0.769  | 0.760  |

Poly(DVB)-DCE

|               |        |        |        |        |        |        |        |        |
|---------------|--------|--------|--------|--------|--------|--------|--------|--------|
| T(K)          | 313.15 | 323.15 | 333.15 | 343.15 | 353.15 | 363.15 | 373.15 | 383.15 |
| CCl4          | 0.489  | 0.491  | 0.493  | 0.494  | 0.496  | 0.498  | 0.499  | 0.501  |
| Nitromethane  | 3.990  | 3.985  | 3.979  | 3.973  | 3.967  | 3.961  | 3.956  | 3.950  |
| DCM           | 3.248  | 3.251  | 3.254  | 3.256  | 3.259  | 3.261  | 3.264  | 3.267  |
| TCM           | 4.232  | 4.214  | 4.197  | 4.179  | 4.162  | 4.144  | 4.127  | 4.109  |
| Diethyl ether | 7.010  | 6.894  | 6.778  | 6.662  | 6.546  | 6.430  | 6.314  | 6.198  |
| THF           | 6.620  | 6.497  | 6.374  | 6.251  | 6.128  | 6.005  | 5.882  | 5.758  |
| Ethyl Acetate | 6.551  | 6.435  | 6.319  | 6.203  | 6.086  | 5.970  | 5.854  | 5.738  |
| Acetone       | 6.842  | 6.780  | 6.718  | 6.656  | 6.593  | 6.531  | 6.469  | 6.407  |
| Acetonitrile  | 7.855  | 7.779  | 7.703  | 7.628  | 7.552  | 7.477  | 7.401  | 7.325  |
| Toluene       | 1.915  | 1.894  | 1.872  | 1.850  | 1.828  | 1.806  | 1.785  | 1.763  |
| Benzene       | 0.158  | 0.158  | 0.157  | 0.157  | 0.157  | 0.157  | 0.157  | 0.156  |
| Methanol      | 15.300 | 15.232 | 15.163 | 15.095 | 15.026 | 14.958 | 14.890 | 14.821 |
| Ethanol       | 13.614 | 13.521 | 13.429 | 13.336 | 13.243 | 13.151 | 13.058 | 12.965 |
| Cyclohexane   | 0.768  | 0.770  | 0.773  | 0.775  | 0.777  | 0.780  | 0.782  | 0.784  |

Poly(DVB)-NB

|               |        |        |        |        |        |        |        |        |
|---------------|--------|--------|--------|--------|--------|--------|--------|--------|
| T(K)          | 313.15 | 323.15 | 333.15 | 343.15 | 353.15 | 363.15 | 373.15 | 383.15 |
| CCl4          | 0.490  | 0.503  | 0.501  | 0.500  | 0.498  | 0.496  | 0.495  | 0.493  |
| Nitromethane  | 4.011  | 3.994  | 3.977  | 3.961  | 3.944  | 3.927  | 3.910  | 3.893  |
| DCM           | 3.264  | 3.257  | 3.250  | 3.243  | 3.236  | 3.229  | 3.222  | 3.215  |
| TCM           | 4.221  | 4.199  | 4.177  | 4.155  | 4.133  | 4.111  | 4.089  | 4.067  |
| Diethyl ether | 7.079  | 6.954  | 6.829  | 6.703  | 6.578  | 6.453  | 6.327  | 6.202  |
| THF           | 6.690  | 6.559  | 6.429  | 6.298  | 6.167  | 6.037  | 5.906  | 5.775  |
| Ethyl Acetate | 6.602  | 6.480  | 6.359  | 6.237  | 6.116  | 5.994  | 5.872  | 5.751  |
| Acetone       | 6.938  | 6.855  | 6.772  | 6.688  | 6.605  | 6.521  | 6.438  | 6.355  |
| Acetonitrile  | 7.916  | 7.825  | 7.734  | 7.642  | 7.551  | 7.460  | 7.369  | 7.278  |
| Toluene       | 1.931  | 1.905  | 1.880  | 1.855  | 1.830  | 1.804  | 1.779  | 1.754  |
| Benzene       | 0.160  | 0.160  | 0.159  | 0.158  | 0.158  | 0.157  | 0.157  | 0.156  |
| Methanol      | 15.396 | 15.290 | 15.184 | 15.078 | 14.972 | 14.865 | 14.759 | 14.653 |
| Ethanol       | 13.708 | 13.584 | 13.461 | 13.338 | 13.214 | 13.091 | 12.967 | 12.844 |
| Cyclohexane   | 0.769  | 0.769  | 0.768  | 0.768  | 0.768  | 0.768  | 0.768  | 0.767  |

| Poly(DVB)-DCE   |        |        |        |        |        |        |        |        |
|-----------------|--------|--------|--------|--------|--------|--------|--------|--------|
| T(K)            | 313.15 | 323.15 | 333.15 | 343.15 | 353.15 | 363.15 | 373.15 | 383.15 |
| CCl4            | 1.589  | 1.554  | 1.518  | 1.483  | 1.448  | 1.413  | 1.378  | 1.342  |
| Nitromethane    | 13.495 | 13.108 | 12.722 | 12.336 | 11.949 | 11.563 | 11.176 | 10.790 |
| Dichloromethane | 14.688 | 14.568 | 14.448 | 14.328 | 14.208 | 14.088 | 13.968 | 13.848 |
| TCM             | 12.915 | 12.628 | 12.342 | 12.056 | 11.770 | 11.484 | 11.197 | 10.911 |
| Diethyl ether   | 26.676 | 25.464 | 24.253 | 23.041 | 21.830 | 20.618 | 19.407 | 18.195 |
| THF             | 25.576 | 24.363 | 23.150 | 21.937 | 20.724 | 19.512 | 18.299 | 17.086 |
| ethyl acetate   | 24.484 | 23.457 | 22.430 | 21.403 | 20.376 | 19.349 | 18.322 | 17.295 |
| Acetone         | 26.633 | 25.493 | 24.354 | 23.214 | 22.075 | 20.936 | 19.796 | 18.657 |
| Acetonitrile    | 26.631 | 25.491 | 24.352 | 23.212 | 22.073 | 20.934 | 19.794 | 18.655 |
| toluene         | 7.278  | 6.882  | 6.486  | 6.090  | 5.694  | 5.298  | 4.902  | 4.506  |
| benzene         | 0.518  | 0.507  | 0.496  | 0.485  | 0.474  | 0.463  | 0.452  | 0.441  |
| Methanol        | 53.038 | 51.323 | 49.609 | 47.894 | 46.180 | 44.466 | 42.751 | 41.037 |
| ethanol         | 36.465 | 34.655 | 32.845 | 31.035 | 29.225 | 27.415 | 25.605 | 23.795 |
| cyclohexane     | 1.978  | 1.933  | 1.888  | 1.843  | 1.798  | 1.753  | 1.708  | 1.663  |

| Poly(CDVB)-DCE       |                         |        |        |        |
|----------------------|-------------------------|--------|--------|--------|
| Solvents             | DGa(T)                  | DSa    | DHa    | Ta_max |
| n-Pentane            | $y = -0.0577x + 46.939$ | 0.0577 | 46.939 | 813.50 |
| n-Hexane             | $y = -0.0654x + 53.934$ | 0.0654 | 53.934 | 824.68 |
| n-Heptane            | $y = -0.0732x + 60.928$ | 0.0732 | 60.928 | 832.35 |
| n-Octane             | $y = -0.0809x + 67.923$ | 0.0809 | 67.923 | 839.59 |
| n-Nonane             | $y = -0.0887x + 74.917$ | 0.0887 | 74.917 | 844.61 |
| Carbon tetrachloride | $y = -0.0639x + 52.973$ | 0.0639 | 52.973 | 829.00 |
| Nitromethane         | $y = -0.0501x + 42.4$   | 0.0501 | 42.4   | 846.31 |
| Dichloromethane      | $y = -0.0486x + 40.962$ | 0.0486 | 40.962 | 842.84 |
| Trichloromethane     | $y = -0.0592x + 49.875$ | 0.0592 | 49.875 | 842.48 |
| Diethyl ether        | $y = -0.0672x + 54.199$ | 0.0672 | 54.199 | 806.53 |
| THF                  | $y = -0.062x + 48.886$  | 0.062  | 48.886 | 788.48 |
| Ethyl Acetate        | $y = -0.0669x + 53.494$ | 0.0669 | 53.494 | 799.61 |
| Acetone              | $y = -0.0491x + 40.834$ | 0.0491 | 40.834 | 831.65 |
| Acetonitrile         | $y = -0.0454x + 37.165$ | 0.0454 | 37.165 | 818.61 |
| Toluene              | $y = -0.0649x + 53.54$  | 0.0649 | 53.54  | 824.96 |
| Benzene              | $y = -0.0571x + 46.512$ | 0.0571 | 46.512 | 814.57 |
| Methanol             | $y = -0.0433x + 40.37$  | 0.0433 | 40.37  | 932.33 |

|                      |                         |        |        |        |
|----------------------|-------------------------|--------|--------|--------|
| Ethanol              | $y = -0.0506x + 44.688$ | 0.0506 | 44.688 | 883.16 |
| Cyclohexane          | $y = -0.0628x + 52.145$ | 0.0628 | 52.145 | 830.33 |
| Poly(CDVB)-NB        |                         |        |        |        |
| Solvents             | DGa(T)                  | DSa    | DHa    | Ta_max |
| n-Pentane            | $y = -0.0583x + 47.222$ | 0.0583 | 47.222 | 809.98 |
| n-Hexane             | $y = -0.0664x + 54.347$ | 0.0664 | 54.347 | 818.48 |
| n-Heptane            | $y = -0.0744x + 61.471$ | 0.0744 | 61.471 | 826.22 |
| n-Octane             | $y = -0.0825x + 68.596$ | 0.0825 | 68.596 | 831.47 |
| n-Nonane             | $y = -0.0905x + 75.72$  | 0.0905 | 75.72  | 836.69 |
| Carbon tetrachloride | $y = -0.065x + 53.417$  | 0.065  | 53.417 | 821.80 |
| Nitromethane         | $y = -0.0534x + 43.665$ | 0.0534 | 43.665 | 817.70 |
| Dichloromethane      | $y = -0.0514x + 42.026$ | 0.0514 | 42.026 | 817.63 |
| Trichloromethane     | $y = -0.0659x + 52.662$ | 0.0659 | 52.662 | 799.12 |
| Diethyl ether        | $y = -0.0712x + 56.043$ | 0.0712 | 56.043 | 787.12 |
| THF                  | $y = -0.0653x + 50.492$ | 0.0653 | 50.492 | 773.23 |
| Ethyl Acetate        | $y = -0.0719x + 55.794$ | 0.0719 | 55.794 | 775.99 |
| Acetone              | $y = -0.0496x + 40.981$ | 0.0496 | 40.981 | 826.23 |
| Acetonitrile         | $y = -0.05x + 39.085$   | 0.05   | 39.085 | 781.70 |
| Toluene              | $y = -0.0668x + 54.388$ | 0.0668 | 54.388 | 814.19 |
| Benzene              | $y = -0.0579x + 46.838$ | 0.0579 | 46.838 | 808.95 |
| Methanol             | $y = -0.0534x + 44.404$ | 0.0534 | 44.404 | 831.54 |
| Ethanol              | $y = -0.0593x + 48.241$ | 0.0593 | 48.241 | 813.51 |
| Cyclohexane          | $y = -0.0642x + 52.748$ | 0.0642 | 52.748 | 821.62 |
| Poly(DVB)-DCE        |                         |        |        |        |
| Solvents             | DGa(T)                  | DSa    | DHa    | Ta_max |
| n-Pentane            | $y = -0.0652x + 50.725$ | 0.0652 | 50.725 | 777.99 |
| n-Hexane             | $y = -0.069x + 56.142$  | 0.069  | 56.142 | 813.65 |
| n-Heptane            | $y = -0.0727x + 61.558$ | 0.0727 | 61.558 | 846.74 |
| n-Octane             | $y = -0.0765x + 66.975$ | 0.0765 | 66.975 | 875.49 |
| n-Nonane             | $y = -0.0802x + 72.392$ | 0.0802 | 72.392 | 902.64 |
| Carbon tetrachloride | $y = -0.068x + 55.449$  | 0.068  | 55.449 | 815.43 |
| Nitromethane         | $y = -0.0607x + 47.575$ | 0.0607 | 47.575 | 783.77 |
| Dichloromethane      | $y = -0.0597x + 46.277$ | 0.0597 | 46.277 | 775.16 |
| Trichloromethane     | $y = -0.0654x + 53.266$ | 0.0654 | 53.266 | 814.46 |
| Diethyl ether        | $y = -0.075x + 58.665$  | 0.075  | 58.665 | 782.20 |
| THF                  | $y = -0.073x + 54.634$  | 0.073  | 54.634 | 748.41 |
| Ethyl Acetate        | $y = -0.0748x + 57.967$ | 0.0748 | 57.967 | 774.96 |

|                      |                         |        |        |        |
|----------------------|-------------------------|--------|--------|--------|
| Acetone              | $y = -0.0633x + 47.807$ | 0.0633 | 47.807 | 755.24 |
| Acetonitrile         | $y = -0.0617x + 44.9$   | 0.0617 | 44.9   | 727.71 |
| Toluene              | $y = -0.0695x + 56.271$ | 0.0695 | 56.271 | 809.65 |
| Benzene              | $y = -0.0649x + 50.375$ | 0.0649 | 50.375 | 776.19 |
| Methanol             | $y = -0.0579x + 47.73$  | 0.0579 | 47.73  | 824.35 |
| Ethanol              | $y = -0.0635x + 51.362$ | 0.0635 | 51.362 | 808.85 |
| Cyclohexane          | $y = -0.0673x + 54.763$ | 0.0673 | 54.763 | 813.71 |
| Poly(DVB)-NB         |                         |        |        |        |
| Solvents             | DGa(T)                  | DSa    | DHa    | Ta_max |
| n-Pentane            | $y = -0.063x + 50.564$  | 0.063  | 50.564 | 802.60 |
| n-Hexane             | $y = -0.0683x + 56.731$ | 0.0683 | 56.731 | 830.61 |
| n-Heptane            | $y = -0.0735x + 62.897$ | 0.0735 | 62.897 | 855.74 |
| n-Octane             | $y = -0.0788x + 69.064$ | 0.0788 | 69.064 | 876.45 |
| n-Nonane             | $y = -0.084x + 75.23$   | 0.084  | 75.23  | 895.60 |
| Carbon tetrachloride | $y = -0.0672x + 55.925$ | 0.0672 | 55.925 | 832.22 |
| Nitromethane         | $y = -0.0576x + 46.759$ | 0.0576 | 46.759 | 811.79 |
| Dichloromethane      | $y = -0.0563x + 45.37$  | 0.0563 | 45.37  | 805.86 |
| Trichloromethane     | $y = -0.063x + 52.908$  | 0.063  | 52.908 | 839.81 |
| Diethyl ether        | $y = -0.0729x + 58.496$ | 0.0729 | 58.496 | 802.41 |
| THF                  | $y = -0.0697x + 53.875$ | 0.0697 | 53.875 | 772.96 |
| Ethyl Acetate        | $y = -0.0723x + 57.615$ | 0.0723 | 57.615 | 796.89 |
| Acetone              | $y = -0.06x + 46.793$   | 0.06   | 46.793 | 779.88 |
| Acetonitrile         | $y = -0.0566x + 43.065$ | 0.0566 | 43.065 | 760.87 |
| Toluene              | $y = -0.0684x + 56.656$ | 0.0684 | 56.656 | 828.30 |
| Benzene              | $y = -0.0626x + 50.166$ | 0.0626 | 50.166 | 801.37 |
| Methanol             | $y = -0.0538x + 46.025$ | 0.0538 | 46.025 | 855.48 |
| Ethanol              | $y = -0.06x + 50.063$   | 0.06   | 50.063 | 834.38 |
| Cyclohexane          | $y = -0.0663x + 55.138$ | 0.0663 | 55.138 | 831.64 |
| Poly(DVB)            |                         |        |        |        |
| Solvents             | DGa(T)                  | DSa    | DHa    | Ta_max |
| n-Pentane            | $y = -0.1119x + 68.387$ | 0.1119 | 68.387 | 611.14 |
| n-Hexane             | $y = -0.1723x + 100.11$ | 0.1723 | 100.11 | 581.02 |
| n-Heptane            | $y = -0.2264x + 128.56$ | 0.2264 | 128.56 | 567.84 |
| n-Octane             | $y = -0.3005x + 167.53$ | 0.3005 | 167.53 | 557.50 |
| n-Nonane             | $y = -0.3471x + 192.01$ | 0.3471 | 192.01 | 553.18 |
| Carbon tetrachloride | $y = -0.1619x + 95.491$ | 0.1619 | 95.491 | 589.81 |
| Nitromethane         | $y = -0.0688x + 51.004$ | 0.0688 | 51.004 | 741.34 |

|                  |                         |        |        |         |
|------------------|-------------------------|--------|--------|---------|
| Dichloromethane  | $y = -0.0389x + 42.13$  | 0.0389 | 42.13  | 1083.03 |
| Trichloromethane | $y = -0.1149x + 76.78$  | 0.1149 | 76.78  | 668.23  |
| Diethyl ether    | $y = -0.203x + 117.19$  | 0.203  | 117.19 | 577.29  |
| THF              | $y = -0.1603x + 93.628$ | 0.1603 | 93.628 | 584.08  |
| Ethyl Acetate    | $y = -0.1816x + 107.68$ | 0.1816 | 107.68 | 592.95  |
| Acetone          | $y = -0.1337x + 80.073$ | 0.1337 | 80.073 | 598.90  |
| Acetonitrile     | $y = -0.1356x + 81.345$ | 0.1356 | 81.345 | 599.89  |
| Toluene          | $y = -0.1844x + 105.34$ | 0.1844 | 105.34 | 571.26  |
| Benzene          | $y = -0.1073x + 66.244$ | 0.1073 | 66.244 | 617.37  |
| Methanol         | $y = -0.1872x + 119.73$ | 0.1872 | 119.73 | 639.58  |
| Ethanol          | $y = -0.1919x + 106.16$ | 0.1919 | 106.16 | 553.20  |
| Cyclohexane      | $y = -0.1531x + 91.07$  | 0.1531 | 91.07  | 594.84  |

We found that  $\Delta G_a^0(T) = \Delta H_a^0 - T \Delta S_a^0$  is verified for all adsorbed solvents with a strong linearity of

$$\Delta H_a^0 = \Delta H_a^0(\Delta S_a^0 = 0) + T_{int.} \Delta S_a^0$$

The values of  $\Delta H_a^0$  and  $\Delta S_a^0$  are given below for n-alkanes, polar solvents and all solvents, and for the various copolymers.

| <b>Poly(CDVB)-DCE</b> |                          |        |         |                |
|-----------------------|--------------------------|--------|---------|----------------|
| S(m <sup>2</sup> /g)  | 1317.8                   |        |         |                |
| Parameters            | DHa=f(DSa) (kJ/mol)      | Tint.  | DHa(OK) | R <sup>2</sup> |
| n-alkanes             | DHa = 897.68 DSa- 4.7015 | 897.68 | -4.7015 | 0.9998         |
| Polar solvents        | DHa = 684.59 DSa+ 8.3187 | 684.59 | 8.3187  | 0.9484         |
| All solvents          | DHa = 796.82 DSa+ 2.1456 | 796.82 | 2.1456  | 0.974          |
| <b>Poly(CDVB)-NB</b>  |                          |        |         |                |
| S(m <sup>2</sup> /g)  | 1268.6                   |        |         |                |
| Parameters            | DHa=f(DSa) (kJ/mol)      | Tint.  | DHa(OK) | R <sup>2</sup> |
| n-alkanes             | DHa = 885.03 DSa- 4.3925 | 885.03 | -4.3925 | 1              |
| Polar solvents        | DHa = 731.8 DSa+ 4.4427  | 731.8  | 4.4427  | 0.9668         |
| All solvents          | DHa = 839.01 DSa- 1.7511 | 839.01 | -1.7511 | 0.9812         |
| <b>Poly(DVB)-DCE</b>  |                          |        |         |                |
| S(m <sup>2</sup> /g)  | 1379.5                   |        |         |                |
| Parameters            | DHa=f(DSa) (kJ/mol)      | Tint.  | DHa(OK) | R <sup>2</sup> |
| n-alkanes             | DHa = 1444.4 DSa- 43.48  | 1444.4 | -43.48  | 1              |
| Polar solvents        | DHa = 751.88 DSa+ 2.2701 | 751.88 | 2.2701  | 0.828          |

|                      |                          |        |         |                |
|----------------------|--------------------------|--------|---------|----------------|
| All solvents         | DHa = 1054.3 DSa- 17.02  | 1054.3 | -17.02  | 0.858          |
| <b>Poly(DVB)-NB</b>  |                          |        |         |                |
| S(m <sup>2</sup> /g) | 1236.3                   |        |         |                |
| Parameters           | DHa=f(DSa) (kJ/mol)      | Tint.  | DHa(OK) | R <sup>2</sup> |
| n-alkanes            | DHa = 1174.6 DSa- 23.456 | 1174.6 | -23.456 | 1              |
| Polar solvents       | DHa = 777.23 DSa+ 2.1205 | 777.23 | 2.1205  | 0.8937         |
| All solvents         | DHa = 989.02 DSa- 10.905 | 989.02 | -10.905 | 0.9371         |
| <b>Poly(DVB)</b>     |                          |        |         |                |
| S(m <sup>2</sup> /g) | 775.4                    |        |         |                |
| Parameters           | DHa=f(DSa) (kJ/mol)      | Tint.  | DHa(OK) | R <sup>2</sup> |
| n-alkanes            | DHa = 525.67 DSa+ 9.5523 | 525.67 | 9.5523  | 1              |
| Polar solvents       | DHa = 477.3 DSa+ 19.177  | 477.3  | 19.177  | 0.969          |
| All solvents         | DHa = 501.11 DSa+ 15.607 | 501.11 | 15.607  | 0.9891         |

| DHa(OK)             |                      |                             |                              |                            |
|---------------------|----------------------|-----------------------------|------------------------------|----------------------------|
| Copolymer           | S(m <sup>2</sup> /g) | All solvents                | n-alkanes                    | Polar solvents             |
| poly(DVB)           | 775.4                | 15.607                      | 9.5523                       | 19.177                     |
| poly(DVB)-NB        | 1236.3               | -10.905                     | -23.456                      | 2.1205                     |
| poly(CDVB)-NB       | 1268.6               | -1.7511                     | -4.3925                      | 4.4427                     |
| poly(CDVB)-DCE      | 1317.8               | 2.1456                      | -4.7015                      | 8.3187                     |
| poly(DVB)-DCE       | 1379.5               | -17.02                      | -43.48                       | 2.2701                     |
| Equation DHa(OK, S) |                      | DHa(OK) = -0.043 S + 49.071 | DHa(OK) = -0.0597 S + 58.058 | DHa(OK) = -0.0267 + 39.228 |
| R <sup>2</sup>      |                      | 0.6815                      | 0.4898                       | 0.8204                     |
| Tint.               |                      |                             |                              |                            |
| Copolymer           | S(m <sup>2</sup> /g) | All solvents                | n-alkanes                    | Polar solvents             |
| poly(DVB)           | 775.4                | 501.11                      | 525.67                       | 477.3                      |
| poly(DVB)-NB        | 1236.3               | 989.02                      | 1174.6                       | 777.23                     |
| poly(CDVB)-NB       | 1268.6               | 839.01                      | 885.03                       | 731.8                      |
| poly(CDVB)-DCE      | 1317.8               | 796.82                      | 897.68                       | 684.59                     |
| poly(DVB)-DCE       | 1379.5               | 1054.3                      | 1444.4                       | 751.88                     |
| Equation Tint( S)   |                      | Tint. = 0.7857 S - 103.29   | Tint = 1.1504 S - 389.84     | Tint = 0.4593 S + 135.47   |
| R <sup>2</sup>      |                      | 0.7762                      | 0.6464                       | 0.8404                     |

For polar adsorption parameters, I obtained the following results:

| Copolymer                                            | Equation of $\Delta H_a^p (\Delta S_a^p)$     | $\Delta H_a^p (\Delta S_a^p = 0)$                     | R <sup>2</sup> |
|------------------------------------------------------|-----------------------------------------------|-------------------------------------------------------|----------------|
| Poly(DVB)                                            | $\Delta H_a^p = 528.87 \Delta S_a^p + 3.592$  | 3.592                                                 | 0.973          |
| Poly(DVB)-NB                                         | $\Delta H_a^p = 982.98 \Delta S_a^p + 1.5715$ | 1.5715                                                | 0.7866         |
| Poly(CDVB)-NB                                        | $\Delta H_a^p = 831.17 \Delta S_a^p + 0.1779$ | 0.1779                                                | 0.9579         |
| Poly(CDVB)-DCE                                       | $\Delta H_a^p = 950.26 \Delta S_a^p + 0.7823$ | 0.7823                                                | 0.8683         |
| Poly(DVB)-DCE                                        | $\Delta H_a^p = 934.02 \Delta S_a^p + 2.5426$ | 2.5426                                                | 0.6466         |
| Equation of $\Delta H_a^p (\Delta S_a^p = 0)$ , in S |                                               | $\Delta H_a^p (\Delta S_a^p = 0) = -0.0037 S + 6.203$ |                |
| R <sup>2</sup>                                       |                                               | 0.4353                                                |                |

| Copolymer                          | $T_{int.}^p$ (S) (K)           |
|------------------------------------|--------------------------------|
| Poly(DVB)                          | 528.87                         |
| Poly(DVB)-NB                       | 982.98                         |
| Poly(CDVB)-NB                      | 831.17                         |
| Poly(CDVB)-DCE                     | 950.26                         |
| Poly(DVB)-DCE                      | 934.02                         |
| Equations of $T_{int.}^p$ (S) in S | $T_{p int} = 0.7175S - 12.318$ |
| R <sup>2</sup>                     | 0.8655                         |

I studied the effect of SSA of copolymers on  $\Delta H_a^0$  and  $\Delta S_a^0$  and on  $\Delta H_a^p$  and  $\Delta S_a^p$ . I found the following linear equations (Table 10 for total adsorption parameters and Table 11 for polar contribution).

A deeper analysis is really welcomed.

**Table 10.** Results on the total adsorption parameters:

| Solvents             | $\Delta H_a^0$ (S)       | R <sup>2</sup> | $\Delta S_a^0$ (S)         | R <sup>2</sup> | $T_{int.}^0$ (S)        | R <sup>2</sup> |
|----------------------|--------------------------|----------------|----------------------------|----------------|-------------------------|----------------|
| n-Pentane            | DHa = -0.0351 S + 94.688 | 0.8990         | DSa = -0.00009 S + 0.17997 | 0.9116         | Ta = 0.335 S + 362.765  | 0.8795         |
| n-Hexane             | DHa = -0.0811 S + 161.26 | 0.9483         | DSa = -0.00019 S + 0.31501 | 0.9460         | Ta = 0.431 S + 258.410  | 0.9268         |
| n-Heptane            | DHa = -0.1213 S + 220.09 | 0.9555         | DSa = -0.00028 S + 0.43523 | 0.9525         | Ta = 0.492 S + 197.670  | 0.9383         |
| n-Octane             | DHa = -0.1805 S + 303.78 | 0.9572         | DSa = -0.00040 S + 0.60264 | 0.9546         | Ta = 0.544 S + 147.537  | 0.9387         |
| n-Nonane             | DHa = -0.2135 S + 353.24 | 0.9586         | DSa = -0.00047 S + 0.70514 | 0.9560         | Ta = 0.586 S + 113.790  | 0.9318         |
| Carbon tetrachloride | DHa = -0.0743 S + 151.45 | 0.9461         | DSa = -0.00017 S + 0.29210 | 0.9447         | Ta = 0.420 S + 275.400  | 0.9261         |
| Nitromethane         | DHa = -0.0103 S + 58.593 | 0.5343         | DSa = -0.00002 S + 0.08570 | 0.5955         | Ta = 0.125 S + 650.441  | 0.5784         |
| Dichloromethane      | DHa = 0.0032 S + 39.521  | 0.1106         | DSa = 0.00003 S + 0.01683  | 0.7402         | Ta = -0.502 S + 1465.55 | 0.9482         |
| Trichloromethane     | DHa = -0.0446 S + 110.37 | 0.9386         | DSa = -0.00009 S + 0.18492 | 0.9346         | Ta = 0.279 S + 459.479  | 0.8723         |

|               |                          |        |                            |        |                        |        |
|---------------|--------------------------|--------|----------------------------|--------|------------------------|--------|
| Diethyl ether | DHa = -0.109 S + 199.29  | 0.9440 | DSa = -0.00024 S + 0.38138 | 0.9433 | Ta = 0.389 S + 286.677 | 0.9182 |
| THF           | DHa = -0.075 S + 149.95  | 0.9259 | DSa = -0.00017 S + 0.28532 | 0.9273 | Ta = 0.330 S + 338.433 | 0.8834 |
| Ethyl Acetate | DHa = -0.093 S + 177.7   | 0.9428 | DSa = -0.00020 S + 0.33100 | 0.9417 | Ta = 0.346 S + 334.061 | 0.9103 |
| Acetone       | DHa = -0.0643 S + 128.23 | 0.8936 | DSa = -0.00014 S + 0.23813 | 0.8977 | Ta = 0.350 S + 340.405 | 0.7915 |
| Acetonitrile  | DHa = -0.0721 S + 135.35 | 0.9044 | DSa = -0.00015 S + 0.24537 | 0.9009 | Ta = 0.302 S + 376.927 | 0.7528 |
| Toluene       | DHa = -0.0907 S + 173.68 | 0.9476 | DSa = -0.00021 S + 0.34336 | 0.9457 | Ta = 0.444 S + 238.990 | 0.9258 |
| Benzene       | DHa = -0.0319 S + 90.142 | 0.8888 | DSa = -0.00008 S + 0.16966 | 0.9051 | Ta = 0.322 S + 378.553 | 0.8728 |
| Methanol      | DHa = -0.1354 S + 221.56 | 0.9382 | DSa = -0.00024 S + 0.37042 | 0.9371 | Ta = 0.399 S + 339.987 | 0.7938 |
| Ethanol       | DHa = -0.1038 S + 184.23 | 0.9355 | DSa = -0.00024 S + 0.37310 | 0.9392 | Ta = 0.509 S + 172.023 | 0.8929 |
| Cyclohexane   | DHa = -0.0676 S + 142    | 0.9448 | DSa = -0.00016 S + 0.27245 | 0.9434 | Ta = 0.410 S + 288.013 | 0.9232 |

**Table 12.** Results on the polar adsorption parameters:

| Polar solvent                   | $\Delta H_a^p$ (S)               | R <sup>2</sup> | $\Delta S_a^p$ (S)               | R <sup>2</sup> | $T_{int.}^p$ (S)         | R <sup>2</sup> |
|---------------------------------|----------------------------------|----------------|----------------------------------|----------------|--------------------------|----------------|
| CCl4                            | $\Delta H_p = -0.0039S + 5.6613$ | 0.9598         | $\Delta S_p = -0.0062S + 8.269$  | 0.955          | $T_p = 3.1031S - 1730.7$ | 0.4959         |
| Nitromethane                    | $\Delta H_p = -0.0377S + 54.111$ | 0.9597         | $\Delta S_p = -0.0657S + 88.519$ | 0.9604         | $T_p = 1.4221S - 468.08$ | 0.6784         |
| CH <sub>2</sub> Cl <sub>2</sub> | $\Delta H_p = -0.0267S + 38.66$  | 0.96           | $\Delta S_p = -0.0104S + 15.175$ | 0.7243         | $T_p = -1.81S + 3985.9$  | 0.4869         |
| CHCl <sub>3</sub>               | $\Delta H_p = -0.0292S + 44.059$ | 0.9403         | $\Delta S_p = -0.0441S + 62.314$ | 0.8959         | $T_p = 0.5132S + 346.04$ | 0.34           |
| Diethyl ether                   | $\Delta H_p = -0.097S + 137.8$   | 0.9554         | $\Delta S_p = -0.1954S + 268.71$ | 0.9564         | $T_p = 0.5716S + 90.479$ | 0.8236         |
| THF                             | $\Delta H_p = -0.0956S + 135.65$ | 0.9548         | $\Delta S_p = -0.1949S + 268.38$ | 0.9556         | $T_p = 0.4959S + 141.73$ | 0.8471         |
| Ethyl acetate                   | $\Delta H_p = -0.0832S + 119.45$ | 0.956          | $\Delta S_p = -0.1617S + 224.88$ | 0.9565         | $T_p = 0.4725S + 185.53$ | 0.7377         |
| Acetone                         | $\Delta H_p = -0.0965S + 135.07$ | 0.9544         | $\Delta S_p = -0.1927S + 259.4$  | 0.9571         | $T_p = 1.2446S - 435.1$  | 0.9061         |
| Acetonitrile                    | $\Delta H_p = -0.0929S + 132.46$ | 0.9575         | $\Delta S_p = -0.1779S + 243$    | 0.9592         | $T_p = 1.0388S - 249.18$ | 0.6873         |
| Toluene                         | $\Delta H_p = -0.0306S + 42.776$ | 0.9556         | $\Delta S_p = -0.0667S + 89.947$ | 0.9565         | $T_p = 0.9876S - 276.53$ | 0.7823         |
| Benzene                         | $\Delta H_p = -0.0012S + 1.7854$ | 0.9603         | $\Delta S_p = -0.0018S + 2.4957$ | 0.9557         | $T_p = 1.2579S - 221.98$ | 0.5827         |
| Methanol                        | $\Delta H_p = -0.1579S + 226.15$ | 0.959          | $\Delta S_p = -0.287S + 388.91$  | 0.9606         | $T_p = 1.0487S - 206.92$ | 0.7703         |
| Ethanol                         | $\Delta H_p = -0.1358S + 195.83$ | 0.959          | $\Delta S_p = -0.3019S + 409.45$ | 0.9598         | $T_p = 1.0235S - 289.74$ | 0.8796         |
| Cyclohexane                     | $\Delta H_p = -0.0046S + 6.8982$ | 0.9586         | $\Delta S_p = -0.0079S + 10.507$ | 0.9475         | $T_p = 2.7555S - 1459.8$ | 0.516          |
